# Supplementary material for: Late Holocene changes in cyanobacterial community structure in maritime Antarctic lakes
Source: Springer Nature journal article supplement (doi:10.1007/s10933-013-9700-3), 2013-03-11
Supplement: MOESM1 [file 10933_2013_9700_MOESM1_ESM-1.doc]

**Table S1**. The retention time and absorption maxima of the derivates and unknown compounds in the Beak-1 and Beak-2 sediment cores

| **Beak-1** | **Retention time (min)** | **Absorption maxima (nm)** | **Comments** |
| --- | --- | --- | --- |
| Unknown compound | 6.91 | - | tail cf. scytonemin |
| Unknown carotenoids | 5.816 | 426-440 | single maximum - no match with Jeffrey et al. (1997) |
| 7.914 | 454, 478 | absorption maxima cf. fucoxanthin but shape of the spectrum and retention time different |
| 16.104 | 455-465 | single absorption maximum - no match with Jeffrey et al. (1997) |
| 17.04 | 440, 464, 494 | spectrum cf. xanthophyll; absorption maxima shifted |
| 17.641 | 428, 448, 476 | spectrum cf. xanthophyll; retention time shifted |
| 18.771 | 470-480 | single absorption maximum - no match with Jeffrey et al. (1997) |
| 21.269 | 454 | single absorption maximum - no match with Jeffrey et al. (1997) |
| 21.525 | 450 | single absorption maximum - no match with Jeffrey et al. (1997) |
| 21.939 | 450, 475 | absorption maxima cf. fucoxanthin but shape and retention time different |
| 22.174 | 450, 475 | absorption maxima cf. fucoxanthin but shape and retention time different |
| Fucoxanthin derivative | 7.274 | 426, 448, 478 | absorption maxima cf. fucoxanthin but retention time slightly different |
| Butanoylfucoxanthin like | 9.206 | 420, 450, 458 | shape cf. 19'butanoyloxyfucoxanthin but absorption maxima slightly shifted |
| Alloxanthin like | 10.958 | 428, 452, 483 | retention time and absorption maxima cf. alloxanthin. Peak at 483 not well pronounced |
| Lutein like | 11.64 | 422, 444, 472 | absorption maxima cf. lutein but retention time slightly different |
| Vaucheriaxanthin like | 18.24 | 415, 446, 470 | absorption maxima cf. vaucheriaxanthin; retention time different |
| Chlorophyll/carotenoid mixture | 7.331 | 450, 650 |  |
| 8.797 | 448, 468, 668 |  |
| 9.65 | 420, 445, 515, 678 |  |
| 10.095 | 414, 475, 610, 666 |  |
| 18.1 | 450, 660 |  |
| 19.318 | 425, 688 |  |
| 21.5 | 410, 508, 538, 610, 665 |  |
| 23.454 | 412, 454, 698 |  |
| 23.597 | 452, 460, 680 |  |
| Chlorophyll derivative 1 | 20.809 | 425, 450, 626, 687 |  |
| Chlorophyll derivative 2 | 21.5 | 432, 476, 617, 646 |  |
|  |  |  |  |
| **Beak-2** | **Retention time (min)** | **Absorption maxima (nm)** | **Comments** |
| Unknown compound | 6.915 | - | tail cf. scytonemin |
| Myxoxanthophyll derivative | 9.371 | 453, 478, 508 | absorption maxima cf. myxoxanthophyll but shape of the spectrum different |
| Cantaxanthin like | 14.455 | 476 | retention time and shape of spectrum cf. canthaxanthin (Jeffrey et al. 1997); absorption maximum slightly shifted |
| Lutein/zeaxanthin | 14.558-14.917 | 425, 448, 476 & 428, 452, 478 | both pigments in combined peak with two absorption maxima |
| Fucoxanthin derivative | 8.235 | 420, 448, 474 | possibly 19'-Hexanoyloxyfucoxanthin but not validated using standard |
| Fucoxanthin or 19'-Hexanoyloxyfucoxanthin like | 9.14 | 452, 478, 506 | shape of spectrum cf. 19'-Hexanoyloxyfucoxanthin but absorption maxima shifted |
| Fucoxanthin like 2 | 10.625 | 454, 474 | shape cf. fucoxanthin but absorption maxima slightly shifted |
| Lutein derivative like 1 | 12.618 | 425, 450, 476 | retention time and absorption maxima slightly shifted compared with lutein |
| a-carotene like | 19.644 | 424, 448, 474 | spectrum cf. a-carotene but retention time shifted |
| Unknown carotenoids | 7.869 | 454, 478 | absorption maxima cf. fucoxanthin but shape and retention time different |
| 9.133 | 454, 478 | absorption maxima cf. fucoxanthin but shape and retention time different |
| 10.6 | 440-446 | single absorption maximum - no match with Jeffrey et al. (1997) |
| 11.3 | 440-445 | single absorption maximum - no match with Jeffrey et al. (1997) |
| 13.155 | 420, 441, 470 | spectrum cf. xanthophyll; absorption maxima shifted |
| 15.479 | 421, 444, 470 | spectrum and retention time point to vaucheriaxanthin (Jeffrey et al. 1997) - not validated using standard |
| Chlorophyll/carotenoid mixture | 6.257 | 453, 590, 646 | chlorophyllide b like (Jeffrey et al. 1997) - not validated using standard |
| 8.302 | 420, 448, 472, 504, 667 |  |
| 10.935 | 405,453, 476, 662 |  |
| 20.777 | 432, 662 |  |
| 21.254 | 414, 432, 472, 583, 618, 664 | Chlorophyll a derivative mixture |
| 25.141 | 407, 473, 506, 536, 610, 665 |  |
| Chlorophyll derivative 1 | 19.388 | 428, 452, 628, 688 |  |
| Chlorophyll *a* derivative | 20.685 | 432, 524, 658 | retention time shifted compared with chlorophyll *a* |
| Phaeophytin *b* like | 21.910 | 436, 525, 598, 654 | spectrum and retention time comparable with phaeophytin *b* (Jeffrey et al. 1997); not validated using standard |
| Chlorophyll derivative 2 | 21.913 | 414, 437, 474, 598, 655 |  |
| Pyrophaeophytin *a* like | 22.906 | 410, 506, 536, 610, 668 | retention time shifted compared with pyrophaeophytin *a* |
| Phaeophytin *a* like | 23.952 | 410, 474, 507, 538, 610, 668 | retention time shifted compared with phaeophytin *a* |

**Table S2**. The taxonomic affinities of the pigments identified in the Beak-1 and Beak-2 sediment cores [based on Jeffrey et al. (1997), Leavitt and Hodgson (2001), Aneeshkumar and Sujatha (2012)].

| **Pigment** | **Taxonomic affinity** |
| --- | --- |
| Alloxanthin like | Cryptophyta |
| Beta carotene | Plantae, all photosynthetic algae, Cyanobacteria |
| Butanoylfucoxanthin like | Haptophyta, Chrysophyta, Dinophyta |
| 19'Hexanoyloxyfucoxanthin | Prymnesiophyta, Dinophyta |
| Canthaxanthin like | Cyanobacteria, trace pigment in Chlorophyta, Eustigmatophyta |
| Diatoxanthin | Bacillariophyta, Chrysophyta, Haptophyta, Dinophyta |
| Echinenone | Cyanobacteria |
| Fucoxanthin and Fucoxanthin derivative | Bacillariophyta, Chrysophyta, Haptophyta, Raphidophyta, Dinophyta |
| Lutein and lutein like | Chlorophyta, Euglenophyta, Plantae |
| Myxoxanthophyll | Cyanobacteria |
| Vaucheriaxanthin like | Xanthophyta, Eustigmatophyta |
| Zeaxanthin | Prochlorophyta, Cyanobacteria, Chlorophyta, Chrysophyta, Raphidophyta |
| Chlorophyll *c2* | Dinophyta, Bacillariophyta, Chrysophyta |
| Chlorophyllide *a* | derivative of chlorophyll *a* |
| Phaeophorbide *a* | derivative of chlorophyll *a* |
| Chlorophyll *b* | Plantae, Chlorophyta, Euglenophyta |
| Chlorophyll *a* | Plantae, all photosynthetic algae, Cyanobacteria |
| Phaeophytin *b* | derivative of chlorophyll *b* |
| (Pyro)phaeophytin *a* | derivative of chlorophyll *a* |

**Table S3**. Geographical location of the sequences from the OTUs detected in this study. NR indicates that no members of the OTU have yet been recorded in Antarctic locations. *Selection of locations of related sequences from the same OTU

|  |  | **OTU** | | | | | |
| --- | --- | --- | --- | --- | --- | --- | --- |
|  |  | **16ST33** | **16ST34** | **16ST44** | **16ST58** | **16ST101** | **16ST102** |
| **Sampling location*** | Antarctic | Lake Fryxell. McMurdo Dry Valleys (AY151734) | Unnamed Lake. Larsemann Hills (AY493621) | Lake Reid. Larsemann Hills (DQ181701) | NR | NR | NR |
| Lake 52B. Larsemann Hills (AY493593) | Vicinity of Syowa station, Lützow Holm Bay (AB098071) | Fresh Pond (AY541578) and Lake Fryxell (AY151749). McMurdo Ice Shelf | NR | NR | NR |
| Orange Pond. McMurdo Ice Shelf (AY541548) | Lakes in the Larsemann Hills (AY493621, AY493591, AY493592) | Orange Pond (AF263336) and Lunch Pond (AF263335). Bratina Island. | NR | NR | NR |
| Non Antarctic | Ny Ålesund, Spitsbergen, Svalbard (Z82804) | Desert soil. USA (AY577541) | Epilithic river biofilm. France (AY456650) | Travertine deposit. Yellowstone National Park. USA (AY790839) | Freshwater. Czech Republic (FN691914) | Kvaloya. Norway (EU022721) |
| Ward Hunt Lake. Canada (HQ230239) | Lake Steinsfjorden. Norway (Z82776) | Douglas River. Australia (F438215) | Long Island Sound. USA (AY172832) | Lakes Tuusulanjarvi (AJ293105) and Karpjärvi (AJ630439). Finland | Skibotn. Norway (EU022706) |
| Svalbard, glacier moraine. Norway (AM940525) | Karlovy Vary Region. Czech Republic (AM71154) | Canyonlands National Park (EU300529) and Kansas greenland (AF428550). USA | Pyrenees. Spain (FR667293) | Lake Akanko, Hokkaido. Japan (AB551466) | Socompa Volcano’s wetland soil. Andes (FJ592868) |

**Figure S1**. Microscopic observation of sediment core layers. The filamentous structures are possibly related to cyanobacteria. (A-D) Beak-1 sediment core. The depth of the layers where these morphotypes were observed are: (A)-0 cm; (B)-6 cm; (C)-8 cm; and (D)-46 cm. (E- H) Beak-2 sediment core. The depth of the layers where these morphotypes were observed are: (E, H)-1 cm; (F)-5 cm; (G)-132 cm

**Figure S2**. Distance tree based on *Synechococcus* 16S rRNA sequences (*E. coli* positions 369-805) constructed by the neighbor-joining method (Saitou and Nei, 1987) using TREECON (Van de Peer and De Watcher, 1997). Antarctic sequences are marked in bold. The sequences from Beak Island are marked in bold-italics. The tree includes the 5 most related *Synechococcus* strain sequences and the 5 closest uncultured sequences from RDPII. The 5 closest sequences from *Synechococcus* ACE AF098370, the Antarctic sequence AF098372 and the *Synechococcus* sequences from Coolen et al. (2008) (AY303359, AY303360) are also included in the tree. A bootstrap analysis was performed that involved construction of 1000 resampled trees. Only bootstrap values over 85% are shown.

**Supplementary references**

Aneeshkumar N, Sujatha CH (2012) Biomarker pigment signatures in Cochin back water system - A tropical estuary south west coast of India. Est coast Shelf Sci 99: 182-190

Coolen MJL, Talbot HM, Abbas BA, Ward C, Schouten S, Volkman JK, Sinninghe Damsté JS (2008) Sources for sedimentary bacteriohopanepolyols as revealed by 16S rDNA stratigraphy. Environ Microbiol 10: 1783-1803

Jeffrey SW, Vesk M, Mantoura RFC (1997) Phytoplankton pigments: windows into the pastures of the sea. Nat & Resour 33: 14-29

Leavitt PR, Hodgson DA (2001) Sedimentary pigments. In: Smol JP, Birks JHB, Last WM. (ed) Developments in Paloenvironmental Research. Tracking environmental changes using lake sediments. Kluwer Academic Publishers, Dordrecht, pp 295-325

Saitou N, Nei M (1987) The Neighbor-Joining Method - a New Method for Reconstructing Phylogenetic Trees. Mol Biol Evol 4: 406-425

Van de Peer Y, De wachter R (1997) Construction of evolutionary distance trees with TREECON for Windows: Accounting for variation in nucleotide substitution rate among sites. Comput Appl Biosci 13: 227-230
